# Supplementary material
Source: PubMed Central journal article supplement (PMC7612615)
Supplement: EMS143693-supplement-Supplementary_Information.pdf [file EMS143693-supplement-Supplementary_Information.pdf]

# **SUPPLEMENTARY INFORMATION**

## **Drought self-propagation in drylands due to land–atmosphere feedbacks**

Dominik L. Schumacher<sup>1</sup>, Jessica Keune<sup>1</sup>, Paul Dirmeyer<sup>2</sup>, Diego G. Miralles<sup>1</sup>

<sup>1</sup>Hydro-Climate Extremes Lab, Ghent University, Ghent, Belgium

<sup>2</sup>Center for Ocean-Land-Atmosphere Studies, George Mason University, Fairfax, Virginia, USA

**Supplementary Table 1: All 40 recent drought events selected for analysis.**

| ranking | main regions (non-exhaustive)                | time period         |
|---------|----------------------------------------------|---------------------|
| 1       | Western Russia and Kazakhstan                | May 2009 – Aug 2013 |
| 2       | Eastern Europe and western Russia            | May 2014 – Sep 2015 |
| 3       | Eastern Russia, Mongolia, and Manchuria      | Jul 2006 – Feb 2009 |
| 4       | Central Africa                               | Apr 2015 – Oct 2016 |
| 5       | D. R. of the Congo                           | Apr 2013 – Oct 2016 |
| 6       | Siberia, Russian Far East                    | Aug 2013 – Oct 2016 |
| 7       | Great Plains, midwestern & southeastern U.S. | Aug 1987 – Nov 1990 |
| 8       | Gran Chaco, Pampas                           | Feb 2008 – Aug 2009 |
| 9       | Central Africa, D. R. of the Congo           | Nov 2003 – May 2007 |
| 10      | Eastern Russia, Mongolia, and Manchuria      | Jul 2000 – Oct 2003 |
| 11      | Southern Africa                              | Dec 1991 – May 1993 |
| 12      | Northwestern Russia                          | May 1988 – Oct 1989 |
| 13      | Amazonia                                     | Jul 1997 – Feb 1998 |
| 14      | Northern Siberia                             | Jun 2012 – Feb 2014 |
| 15      | Caatinga                                     | Oct 1990 – May 1993 |
| 16      | Amazonia                                     | Sep 1982 – Oct 1983 |
| 17      | Southern and eastern Australia               | Feb 2002 – Jan 2003 |
| 18      | Mongolia, Xinjiang                           | Dec 1994 – Jan 1999 |
| 19      | Amazonia, Central West Brazil                | Oct 2014 – May 2016 |
| 20      | Russian Far East                             | Jun 1991 – Oct 1992 |
| 21      | Tibetan Plateau, Xinjiang                    | Nov 1983 – Mar 1986 |
| 22      | Southern Africa                              | Nov 1982 – Apr 1983 |
| 23      | Great Plains, midwestern U.S.                | Mar 2012 – Mar 2013 |
| 24      | Kazakhstan, Turkmenistan, Uzbekistan         | Dec 1997 – Apr 1999 |
| 25      | Gran Chaco, Pantanal                         | Jun 2011 – Aug 2013 |
| 26      | Northwestern and central Australia           | Jan 2005 – May 2005 |

|    |                                               |                     |
|----|-----------------------------------------------|---------------------|
| 27 | Western and central Australia                 | Jan 2008 – Jul 2008 |
| 28 | Northern Mexico, southwestern U.S.            | Oct 2010 – Oct 2011 |
| 29 | Canadian Prairie                              | Nov 2000 – Sep 2002 |
| 30 | Central and northern Australia                | Jan 1986 – Apr 1986 |
| 31 | Sahel                                         | May 1984 – Sep 1984 |
| 32 | Northwestern Russia                           | Aug 2001 – Jan 2003 |
| 33 | Sudan, South Sudan, Ethiopia, Kenya, Tanzania | Jan 2009 – Oct 2009 |
| 34 | Southern China, Myanmar                       | Aug 2003 – Apr 2004 |
| 35 | Namibia, Botswana, Zambia, Mozambique         | Dec 1994 – May 1995 |
| 36 | Southeastern Australia                        | May 1982 – Dec 1982 |
| 37 | Botswana, Zambia, Zimbabwe, Mozambique        | Jan 1987 – Apr 1987 |
| 38 | Continental southeast Asia                    | Oct 2004 – May 2005 |
| 39 | Southern China                                | Aug 2009 – May 2010 |
| 40 | Nigeria, Niger, Chad, Sudan                   | May 1983 – Nov 1983 |

## Additional Figures

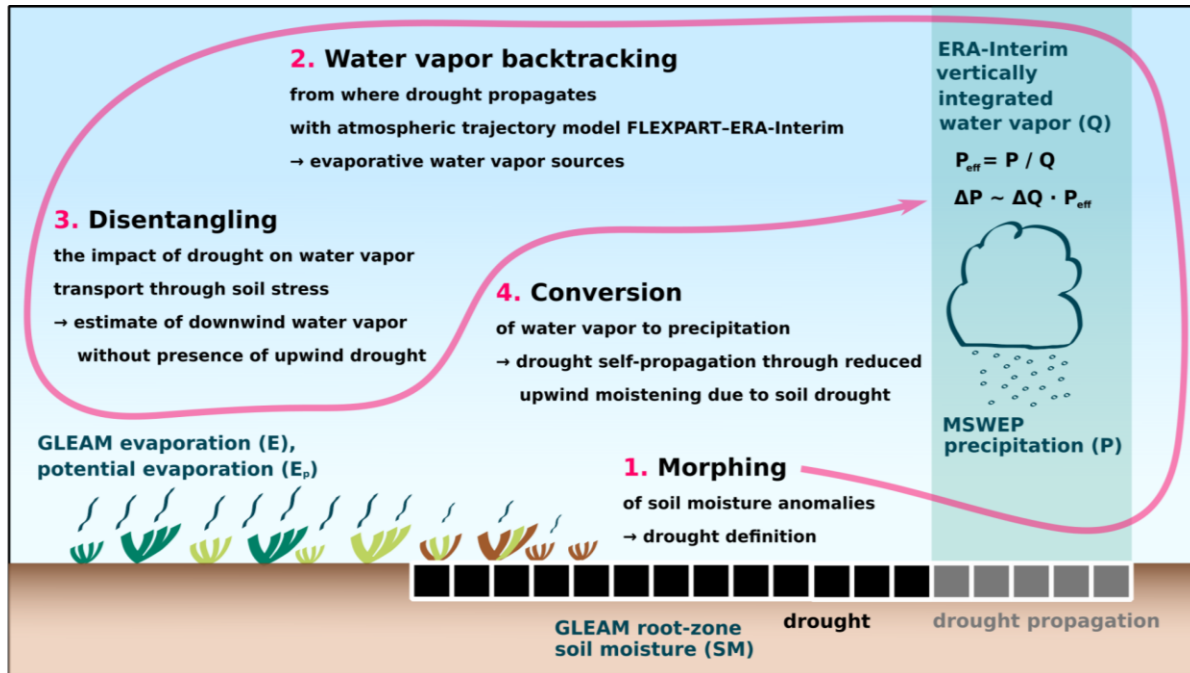

**SFig. 1: Overview of the main methodological steps to estimate drought self-propagation.**

The large pink arrow represents the sequence of the steps (1–4), and text in dark blue font indicates input datasets. After applying the morphing procedure (1.) to root-zone soil moisture anomalies, vertically integrated water vapor (Q) is tracked backwards in time from all areas where the drought propagates (2.), yielding upwind moisture sources and corresponding source–receptor relationships. For the upwind sources already subject to the same spatiotemporally coherent drought event, the downwind reduction in water vapor,  $\Delta Q$ , caused by anomalous soil stress ( $S'$ ) is calculated (3.). At last (4.), this reduction in water vapor is converted to a reduction in precipitation  $\Delta P$  using the observed precipitation efficiency, resulting in an estimate of drought self-propagation solely through soil moisture limitations in upwind tropospheric moistening. This represents the impact of the land surface on downwind precipitation in the absence of land-induced alterations to precipitation efficiency.

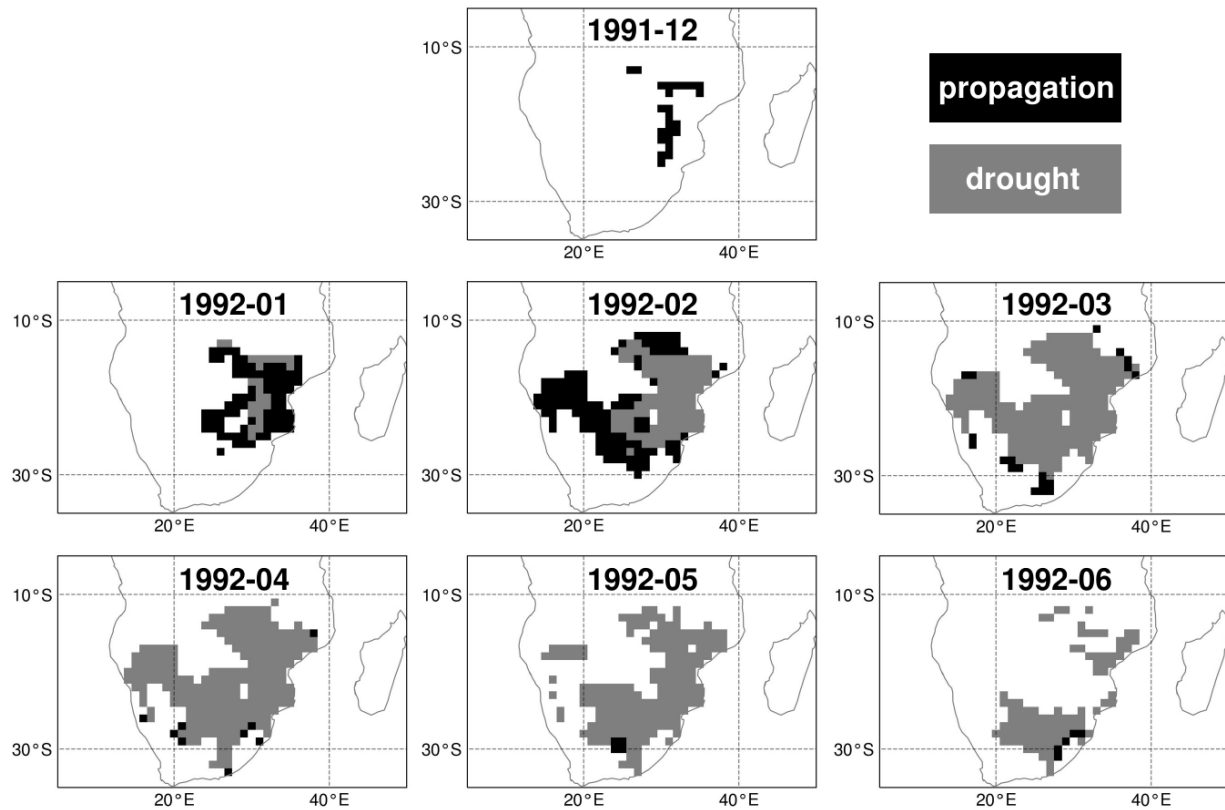

**SFig. 2: Example of a morphed drought event based on monthly root-zone soil moisture anomalies.** The key evolution of the drought is shown, from onset (1991-12) to nearly offset (after 1992-06, only a few morphed drought pixels remain for a few months). Black pixels indicate areas where the drought onset has just occurred (= propagation), whereas grey pixels denote regions in which the drought still persists at the given month. Every pixel may be considered as part of a propagation step only once during each drought event.

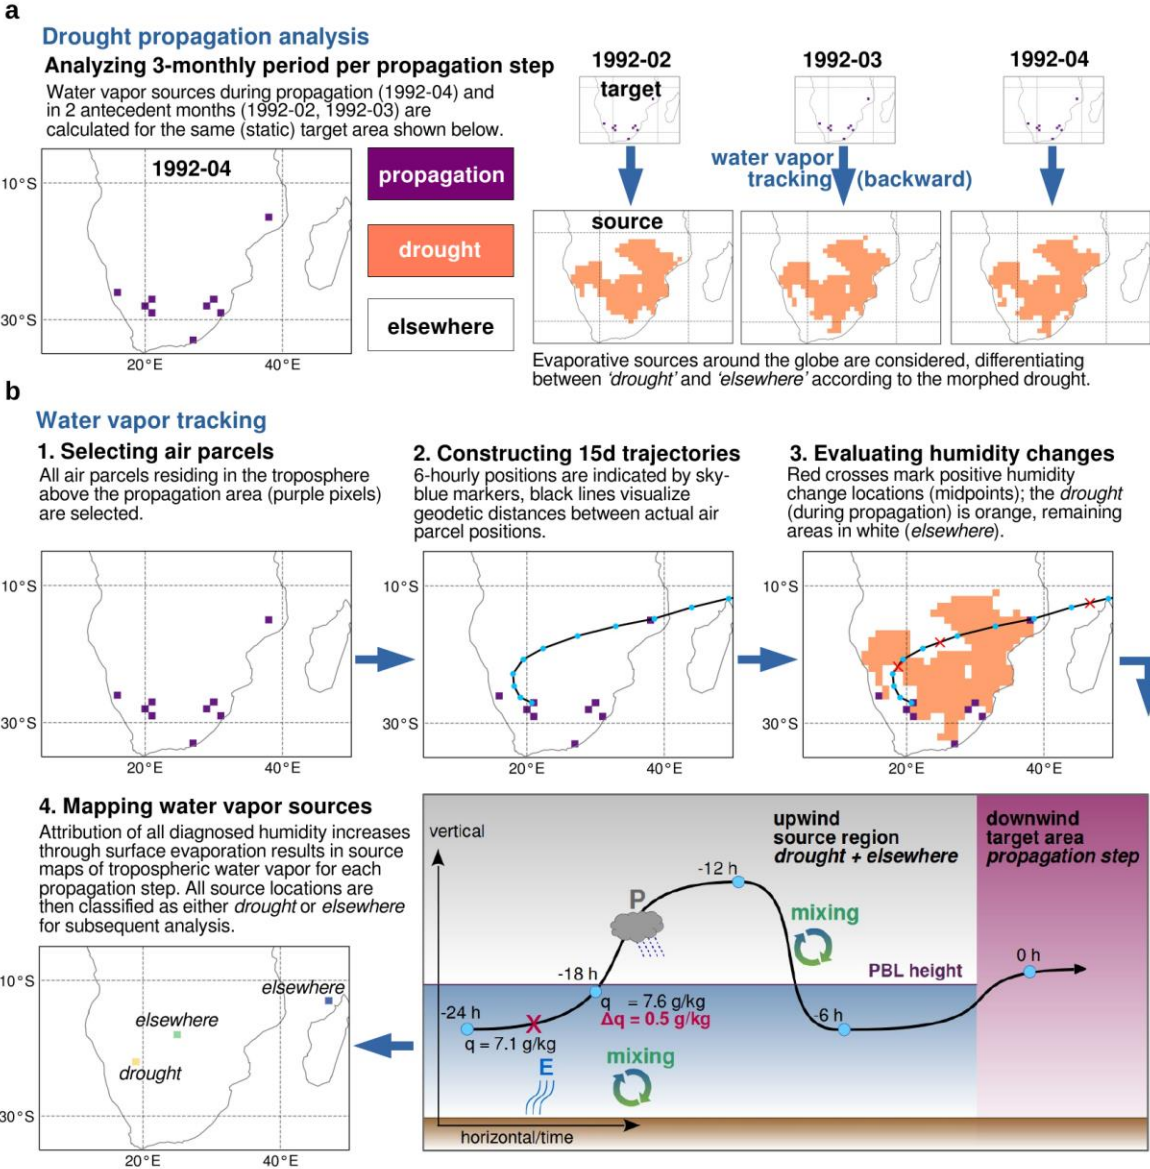

**SFig. 3: Propagation steps and water vapor tracking.** **a**, For drought propagation occurring in 1992-04 (purple pixels), all tropospheric water vapor of the same month is tracked back in time, and also the water vapor that resided over the same target area during the two antecedent months, here 1992-03 and 1992-02, taking soil memory into account. This is performed as such for all propagation steps of all droughts, so that water vapor above the same propagation area is tracked backwards for a total of 3 months, and the source distinction between *drought* and *elsewhere* is based on the respective state of the morphed drought (orange pixels). **b**, Visualization of backward tracking for water vapor residing over the selected propagation area during the month of propagation, 1992-04. Note that steps 1–4 shown here are executed thrice per propagation step, as visualized in **a**.
